# Supplementary material for: Public Health and Economic Impact of Periodic COVID-19 Vaccination with BNT162b2 for Old Adults and High-Risk Patients in an Illustrative Prefecture of Japan: A Budget Impact Analysis
Source: PubMed Central journal article supplement — Infect Dis Ther. 2024 Sep 10;13(10):2155–77. doi: 10.1007/s40121-024-01032-y (PMC11416454; doi:10.1007/s40121-024-01032-y), 2024-09-10
Supplement: 40121_2024_1032_MOESM1_ESM.pdf [file 40121_2024_1032_MOESM1_ESM.pdf]

## Supplementary Material

### Public Health and Economic Impact of Periodic COVID-19 Vaccination with BNT162b2 for Old Adults and High-Risk Patients in an Illustrative Prefecture of Japan: A Budget Impact Analysis

#### **Author name and affiliations**

Mitsuhiro Nagano <sup>1†</sup>, Kosuke Tanabe <sup>2†</sup>, Kazumasa Kamei <sup>1</sup>, Sooyeol Lim <sup>3</sup>, Honoka Nakamura <sup>3</sup>, Shuhei Ito <sup>2</sup>

† Mitsuhiro Nagano and Kosuke Tanabe are co-first authors of the article.

<sup>1</sup> Japan Access and Value, Pfizer Japan Inc., Tokyo, Japan

<sup>2</sup> Vaccine Medical Affairs, Pfizer Japan Inc., Tokyo, Japan

<sup>3</sup> HEOR, Value and Access, INTAGE Healthcare Inc., Tokyo, Japan

#### **Corresponding author**

Name: Mitsuhiro Nagano

Address: Japan Access and Value, Pfizer Japan Inc., 3-22-7, Yoyogi, Shibuya-ku, Tokyo 151-8589, Japan

Email: mitsuhiro.nagano@pfizer.com

## Supplementary tables

**Table S1.** Age-specific population demographics of Prefecture X and 3 municipalities (City A, City B, City C) in Prefecture X

| Age Group<br>(years) | Prefecture X    | City A         | City B          | City C         |
|----------------------|-----------------|----------------|-----------------|----------------|
| <5 years             | 58,113 (4.1%)   | 3,771 (5.5%)   | 13,954 (4.0%)   | 1,409 (3.0%)   |
| 5-11 years           | 95,185 (6.7%)   | 5,187 (7.5%)   | 22,497 (6.5%)   | 2,436 (5.3%)   |
| 12-17 years          | 85,272 (6.0%)   | 4,857 (7.1%)   | 20,632 (6.0%)   | 2,351 (5.1%)   |
| 18-29 years          | 169,733 (12.0%) | 9,070 (13.2%)  | 39,472 (11.4%)  | 4,275 (9.2%)   |
| 30-59 years          | 550,553 (38.9%) | 29,848 (43.4%) | 135,127 (39.2%) | 15,778 (34.0%) |
| 60-64 years          | 80,941 (5.7%)   | 2,884 (4.2%)   | 20,427 (5.9%)   | 3,363 (7.3%)   |
| 65-74 years          | 187,020 (13.2%) | 6,947 (10.1%)  | 47,006 (13.6%)  | 7,827 (16.9%)  |
| ≥75 years            | 186,793 (13.2%) | 6,259 (9.1%)   | 45,951 (13.3%)  | 8,935 (19.3%)  |
| ≥65 years            | 373,813 (26.4%) | 13,206 (19.2%) | 92,957 (26.9%)  | 16,762 (36.1%) |

Source: e-Stat (Portal Site of Official Statistics of Japan). National Census 2020 Basic Tabulation of Population ([46] in References).

**Table S2.** Distribution of included population at the start of the model

| <b>Age Group<br/>(years)</b> | <b>Percentage of population<br/>included in the analysis</b> | <b>Percentage of population<br/>susceptible to COVID-19 at the<br/>start of the model horizon<br/><br/>(A)</b> | <b>Percentage of population with<br/>infection-induced immunity at the<br/>start of the model horizon<br/><br/>(B)</b> | <b>Percentage of population<br/>vaccinated at the start of the<br/>model horizon<br/><br/>(C)</b> | <b>Total<br/>at the start of the<br/>model horizon<br/><br/>(A)+(B)+(C)</b> |
|------------------------------|--------------------------------------------------------------|----------------------------------------------------------------------------------------------------------------|------------------------------------------------------------------------------------------------------------------------|---------------------------------------------------------------------------------------------------|-----------------------------------------------------------------------------|
| 5-11 years                   | 18.3%                                                        | 39.5%                                                                                                          | 30.3%                                                                                                                  | 30.3%                                                                                             | 100%                                                                        |
| 12-17 years                  | 71.7%                                                        | 39.5%                                                                                                          | 30.3%                                                                                                                  | 30.3%                                                                                             | 100%                                                                        |
| 18-29 years                  | 79.8%                                                        | 45.8%                                                                                                          | 27.1%                                                                                                                  | 27.1%                                                                                             | 100%                                                                        |
| 30-59 years                  | 85.1%                                                        | 55.5%                                                                                                          | 22.3%                                                                                                                  | 22.3%                                                                                             | 100%                                                                        |
| 60-64 years                  | 92.7%                                                        | 71.2%                                                                                                          | 14.4%                                                                                                                  | 14.4%                                                                                             | 100%                                                                        |
| 65-74 years                  | 91.3%                                                        | 71.2%                                                                                                          | 14.4%                                                                                                                  | 14.4%                                                                                             | 100%                                                                        |
| ≥75 years                    | 96.7%                                                        | 71.2%                                                                                                          | 14.4%                                                                                                                  | 14.4%                                                                                             | 100%                                                                        |

Source: Ministry of Health, Labour, and Welfare. Survey of Antibody Possession Rates of New Coronavirus Using Residual Blood Samples for Testing at the Second Blood Donation ([49] in References) and Nagano et al. 2024 ([21] in References)

Note: The percentage of Japanese population included in the analysis are those who completed the two injections of the primary dose of the vaccine.

**Table S3.** Subgroup analysis 1: results of cumulative public health and economic impact of COVID-19 vaccination in 3 municipalities in Prefecture

X under different vaccination rates across 3 years

| Municipality | Outcomes                               | 50% vaccination | 90% vaccination | Difference (90% vs. 50%) | 10% vaccination | Difference (10% vs. 50%) |
|--------------|----------------------------------------|-----------------|-----------------|--------------------------|-----------------|--------------------------|
|              |                                        | (A)             | (B)             | (B-A) (%)                | (C)             | (C-A) (%)                |
| City A       | Number of symptomatic cases (n)        | 28,402          | 28,147          | -256 (-0.9%)             | 28,677          | 275 (1.0%)               |
|              | Number of hospitalizations (n)         | 627             | 586             | -41 (-6.5%)              | 670             | 44 (7.0%)                |
|              | Number of COVID-19-related deaths (n)  | 37              | 34              | -4 (-10.5%)              | 42              | 4 (11.3%)                |
|              | Vaccine-related cost (JPY)             | 268,188,537     | 484,214,942     | 216,026,404 (80.6%)      | 53,473,430      | -214,715,107 (-80.1%)    |
|              | Non-vaccine-related medical cost (JPY) | 3,798,765,635   | 3,704,687,071   | -94,078,564 (-2.5%)      | 3,899,775,911   | 101,010,276 (2.7%)       |
|              | Productivity loss (JPY)                | 12,179,896,908  | 11,885,792,283  | -294,104,625 (-2.4%)     | 12,495,817,094  | 315,920,186 (2.6%)       |
|              | Total cost (JPY)                       | 16,246,851,081  | 16,074,694,296  | -172,156,785 (-1.1%)     | 16,449,066,436  | 202,215,355 (1.2%)       |
| City B       | Number of symptomatic cases (n)        | 134,748         | 132,952         | -1,796 (-1.3%)           | 136,679         | 1,931 (1.4%)             |
|              | Number of hospitalizations (n)         | 3,738           | 3,444           | -294 (-7.9%)             | 4,053           | 315 (8.4%)               |
|              | Number of COVID-19-related deaths (n)  | 261             | 233             | -28 (-10.8%)             | 292             | 30 (11.6%)               |
|              | Vaccine-related cost (JPY)             | 1,886,323,877   | 3,405,764,783   | 1,519,440,906 (80.6%)    | 376,108,935     | -1,510,214,942 (-80.1%)  |

|        |                                        |                |                |                        |                |                       |
|--------|----------------------------------------|----------------|----------------|------------------------|----------------|-----------------------|
|        | Non-vaccine-related medical cost (JPY) | 19,331,423,940 | 18,657,619,332 | -673,804,608 (-3.5%)   | 20,054,826,438 | 723,402,498 (3.7%)    |
|        | Productivity loss (JPY)                | 61,958,292,818 | 59,896,564,290 | -2,061,728,528 (-3.3%) | 64,172,837,161 | 2,214,544,343 (3.6%)  |
|        | Total cost (JPY)                       | 83,176,040,635 | 81,959,948,405 | -1,216,092,230 (-1.5%) | 84,603,772,534 | 1,427,731,899 (1.7%)  |
| City C | Number of symptomatic cases (n)        | 16,812         | 16,489         | -323 (-1.9%)           | 17,158         | 347 (2.1%)            |
|        | Number of hospitalizations (n)         | 606            | 551            | -55 (-9.1%)            | 665            | 59 (9.8%)             |
|        | Number of COVID-19-related deaths (n)  | 48             | 43             | -5 (-11.1%)            | 54             | 6 (11.9%)             |
|        | Vaccine-related cost (JPY)             | 339,593,822    | 613,139,293    | 273,545,471 (80.6%)    | 67,710,517     | -271,883,305 (-80.1%) |
|        | Non-vaccine-related medical cost (JPY) | 2,652,195,298  | 2,526,733,791  | -125,461,507 (-4.7%)   | 2,786,876,395  | 134,681,097 (5.1%)    |
|        | Productivity loss (JPY)                | 8,413,557,278  | 8,044,190,646  | -369,366,632 (-4.4%)   | 8,810,264,080  | 396,706,802 (4.7%)    |
|        | Total cost (JPY)                       | 11,405,346,398 | 11,184,063,729 | -221,282,668 (-1.9%)   | 11,664,850,992 | 259,504,594 (2.3%)    |

Note: The target population for vaccination is individuals  $\geq 65$  years old and individuals at high risk at the age of 60 to 64 years old in Prefecture X.

The time horizon is over 3 years.

Abbreviations: COVID-19, coronavirus disease 2019; JPY, Japanese Yen

**Table S4.** Subgroup analysis 2: results of cumulative public health and economic impact of COVID-19 vaccination for all individuals  $\geq 65$  years old in Prefecture X, under different vaccination rates across 3 years

|                                        | 50% vaccination | 90% vaccination | Difference (90% vs. 50%) | 10% vaccination | Difference (10% vs. 50%) |
|----------------------------------------|-----------------|-----------------|--------------------------|-----------------|--------------------------|
| Outcomes                               | (A)             | (B)             | (B-A) (%)                | (C)             | (C-A) (%)                |
| Number of symptomatic cases (n)        | 69,295          | 62,091          | -7,204 (-10.4%)          | 77,039          | 7,744 (11.2%)            |
| Number of hospitalizations (n)         | 9,343           | 8,156           | -1,187 (-12.7%)          | 10,618          | 1,274 (13.6%)            |
| Number of COVID-19-related deaths (n)  | 972             | 858             | -115 (-11.8%)            | 1,095           | 123 (12.6%)              |
| Vaccine-related cost (JPY)             | 7,572,850,789   | 13,672,874,891  | 6,100,024,102 (80.6%)    | 1,509,922,694   | -6,062,928,095 (-80.1%)  |
| Non-vaccine-related medical cost (JPY) | 22,636,921,894  | 19,917,252,557  | -2,719,669,337 (-12.0%)  | 25,556,894,870  | 2,919,972,976 (12.9%)    |
| Testing cost (JPY)                     | 747,846,894     | 666,428,917     | -81,417,977 (-10.9%)     | 835,333,286     | 87,486,392 (11.7%)       |
| Inpatient treatment cost (JPY)         | 15,835,565,687  | 13,822,932,692  | -2,012,632,995 (-12.7%)  | 17,995,493,020  | 2,159,927,334 (13.6%)    |
| Outpatient treatment cost (JPY)        | 3,363,788,315   | 3,026,198,943   | -337,589,372 (-10.0%)    | 3,726,792,469   | 363,004,154 (10.8%)      |
| Long-COVID treatment cost (JPY)        | 2,689,720,998   | 2,401,692,005   | -288,028,993 (-10.7%)    | 2,999,276,094   | 309,555,096 (11.5%)      |
| Productivity loss (JPY)                | 72,965,509,962  | 64,705,270,827  | -8,260,239,134 (-11.3%)  | 81,838,452,434  | 8,872,942,472 (12.2%)    |
| Total cost (JPY)                       | 103,175,282,645 | 98,295,398,275  | -4,879,884,370 (-4.7%)   | 108,905,269,998 | 5,729,987,353 (5.6%)     |

Note: The target population for vaccination is individuals  $\geq 65$  years old in Prefecture X. The time horizon is over 3 years.

Abbreviations: COVID-19, coronavirus disease 2019; JPY, Japanese Yen

**Table S5.** Model inputs for scenario analysis

| Input description                                                     | Base scenario A (reference)                                                                    | Scenario analysis                                                                                                                                         |
|-----------------------------------------------------------------------|------------------------------------------------------------------------------------------------|-----------------------------------------------------------------------------------------------------------------------------------------------------------|
| Vaccine effectiveness (VE)<br>(infection/symptomatic/hospitalization) |                                                                                                |                                                                                                                                                           |
| Scenario 1                                                            | 50% / 60% / 70%                                                                                | 40%/50%/50%                                                                                                                                               |
| Scenario 2                                                            |                                                                                                | 60%/70%/80%                                                                                                                                               |
| Vaccine-induced duration of protection against<br>infection           |                                                                                                |                                                                                                                                                           |
| Scenario 3                                                            | 6 months                                                                                       | 3 months                                                                                                                                                  |
| Scenario 4                                                            |                                                                                                | 9 months                                                                                                                                                  |
| Annual attack rate (%)                                                |                                                                                                |                                                                                                                                                           |
| Scenario 5                                                            | 5–11 years: 32.70%, 12-17 years: 30.51%, 18-29 years:                                          | 30%                                                                                                                                                       |
| Scenario 6:<br><br>-25% (75% of the base case)                        | 27.74%, 30-59 years: 21.09%, 60-64 years: 11.07%, 65-74<br><br>years: 9.09%, ≥ 75 years: 9.13% | 5–11 years: 24.52%, 12-17 years: 22.88%, 18-29 years:<br><br>20.43%, 30-59 years: 15.82%, 60-64 years: 8.30%, 65-74<br><br>years: 6.82%, ≥75 years: 6.85% |

|                                                     |                                                                                                                                                         |                                                                                                                                                              |
|-----------------------------------------------------|---------------------------------------------------------------------------------------------------------------------------------------------------------|--------------------------------------------------------------------------------------------------------------------------------------------------------------|
| Scenario 7:<br><br>+25% (125% of the base case)     |                                                                                                                                                         | 5–11 years: 40.87%, 12-17 years: 38.14%, 18-29 years:<br><br>34.05%, 30-59 years: 26.37%, 60-64 years: 13.84%, 65-74<br><br>years: 11.36%, ≥75 years: 11.41% |
| Hospitalization rate among symptomatic patients (%) |                                                                                                                                                         |                                                                                                                                                              |
| Scenario 8:<br><br>-25% (75% of the base case)      | 5–11 years: 0.80%, 12-17 years: 0.60%, 18-29 years: 1.10%,<br><br>30-59 years: 1.30%, 60-64 years: 2.90%, 65-74 years: 6.00%,<br><br>≥ 75 years: 22.80% | 5–11 years: 0.60%, 12-17 years: 0.45%, 18-29 years: 0.83%,<br><br>30-59 years: 0.95%, 60-64 years: 2.18%, 65-74 years: 4.46%,<br><br>≥75 years: 17.10%       |
| Scenario 9:<br><br>+25% (125% of the base case)     |                                                                                                                                                         | 5–11 years: 1.00%, 12-17 years: 0.75%, 18-29 years: 1.38%,<br><br>30-59 years: 1.58%, 60-64 years: 3.63%, 65-74 years: 7.44%,<br><br>≥75 years: 28.50%       |
| Long COVID incidence rate (outpatient)              |                                                                                                                                                         |                                                                                                                                                              |
| Scenario 10                                         | 29.90%                                                                                                                                                  | 10%                                                                                                                                                          |
| Scenario 11                                         |                                                                                                                                                         | 30%                                                                                                                                                          |
| Long COVID incidence rate (inpatient)               |                                                                                                                                                         |                                                                                                                                                              |
| Scenario 12                                         | 66.70%                                                                                                                                                  | 50%                                                                                                                                                          |

|                                                                           |      |                                                                                                                                                             |
|---------------------------------------------------------------------------|------|-------------------------------------------------------------------------------------------------------------------------------------------------------------|
| Scenario 13                                                               |      | 70%                                                                                                                                                         |
| Workforce participation rate (%)                                          |      |                                                                                                                                                             |
| Scenario 14:<br><br>Consideration of productivity loss from patients only | 100% | 5–11 years: 0.00%, 12-17 years: 23.96%, 18-29 years: 63.14%,<br><br>30-59 years: 86.15%, 60-64 years: 74.00%, 65-74 years:<br><br>42.52%, ≥75 years: 11.40% |
